# Supplementary material for: Evaluation of reanalysis data and dynamical downscaling for surface energy balance modeling at mountain glaciers in western Canada
Source: Copernicus journal article supplement (doi:10.5194/tc-18-17-2024), 2024-01-02
Supplement: Supplementary file 2 [file tc-18-17-2024-supplement.zip]

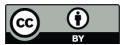

*Supplement of*

**Evaluation of reanalysis data and dynamical downscaling for surface energy balance modeling at mountain glaciers in western Canada**

**Christina Draeger et al.**

*Correspondence to:* Christina Draeger ([cdraeger@eoas.ubc.ca](mailto:cdraeger@eoas.ubc.ca))

- [tc-18-17-2024-supplement-title-page.pdf](#)
- [SI.pdf](#)
- [namelist\\_REF\\_Conrad.input](#)

The copyright of individual parts of the supplement might differ from the article licence.
